# Supplementary material for: Ciprofloxacin Release and Corrosion Behaviour of a Hybrid PEO/PCL Coating on Mg3Zn0.4Ca Alloy
Source: MDPI journal article supplement (doi:10.3390/jfb14020065), 2023-01-25
Supplement: s1 [file s1]

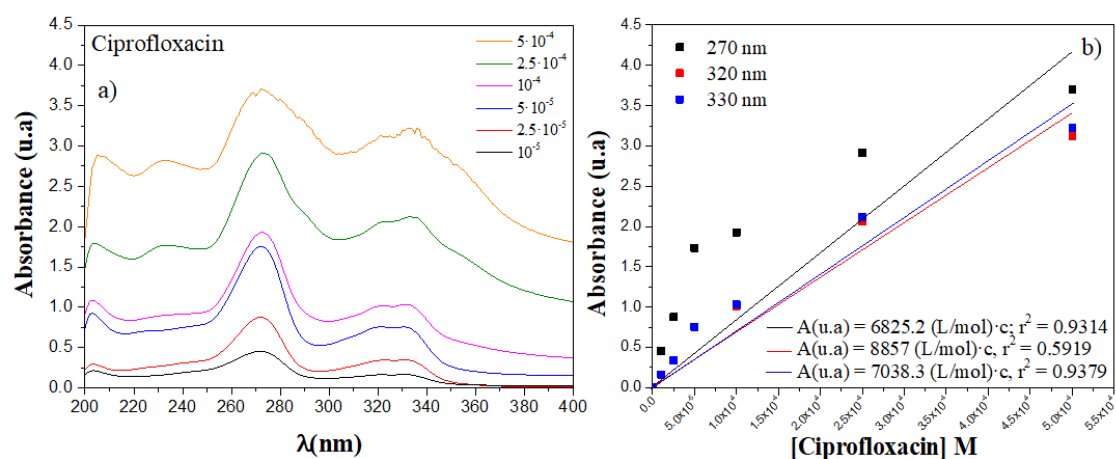

**Figure S1.** Absorption spectra and standard curve of CIP at different concentrations in inorganic  $\alpha$ -MEM solution at 25°C.

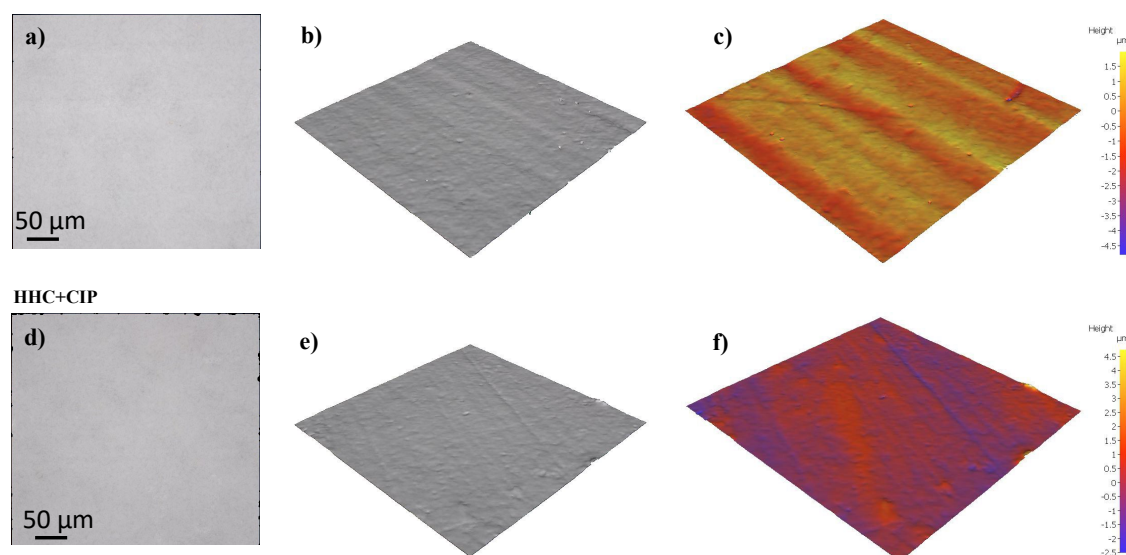

**Figure S2.** (a, d) Optical micrographs, (b, e) 3D rendering and (c, f) -variation of surface topography in 3D of (a-c) drug-free and (d-f) CIP-loaded HHC systems.

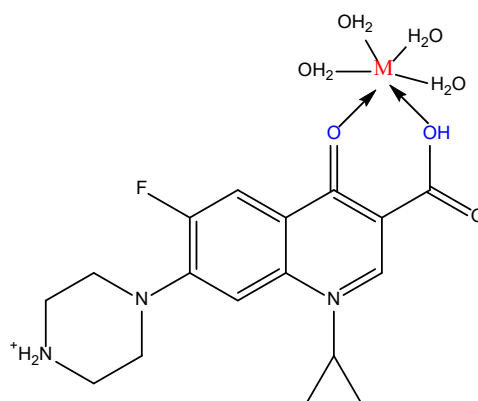

**Figure S3.** Zwitterionic chelate complex of ciprofloxacin with  $Mg^{2+}$  and  $Ca^{2+}$  cations (M) released by PEO coating and Mg alloy.

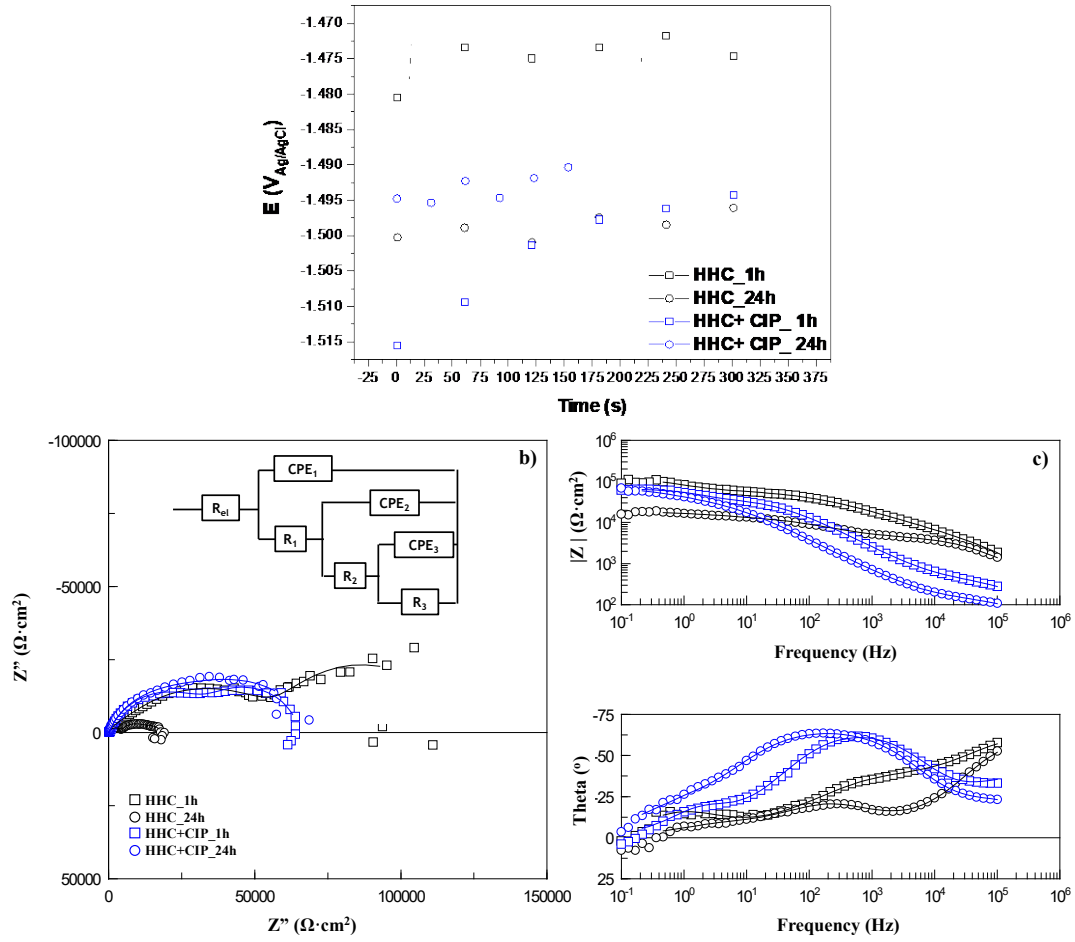

**Figure S4.** (a) Evolution of OCP for HHC and HH+CIP during 1 and 24 h of immersion. (b, c) Nyquist and Bode diagrams for HHC and HHC+CIP specimens after 1 h and 24 h of immersion in inorganic  $\alpha$ -MEM solution at 37°C.

**Table S1.** Fitted electrical parameters of EIS spectra of HHC and HHC+CIP specimens after 1 h and 24 h of immersion in inorganic  $\alpha$ -MEM solution at 37°C. Chi-square range: 0.001446-0.003891.

| HHC system  | $R_{el}$<br>( $\Omega \cdot \text{cm}^2$ ) | $CPE_1$<br>( $\mu\text{S} \cdot \text{s}^n \cdot \text{cm}^{-2}$ ) | $n_1$ | $R_1$<br>( $\Omega \cdot \text{cm}^2$ ) | $CPE_2$<br>( $\mu\text{S} \cdot \text{s}^n \cdot \text{cm}^{-2}$ ) | $n_2$ | $R_2$<br>( $\Omega \cdot \text{cm}^2$ ) | $CPE_3$<br>( $\text{mS} \cdot \text{s}^n \cdot \text{cm}^{-2}$ ) | $n_3$ | $R_3$<br>( $\Omega \cdot \text{cm}^2$ ) |
|-------------|--------------------------------------------|--------------------------------------------------------------------|-------|-----------------------------------------|--------------------------------------------------------------------|-------|-----------------------------------------|------------------------------------------------------------------|-------|-----------------------------------------|
| HHC_1h      | 61.63                                      | 0.02                                                               | 0.78  | 7105                                    | 0.36                                                               | 0.56  | 55877                                   | 5.53                                                             | 0.80  | 57642                                   |
| HHC_24h     | 61.63                                      | 0.02                                                               | 0.78  | 4426                                    | 1.34                                                               | 0.69  | 9154                                    | 28.48                                                            | 0.69  | 4706                                    |
| HHC+CIP_1h  | 61.63                                      | 0.21                                                               | 0.71  | 528.6                                   | 0.24                                                               | 0.81  | 38366                                   | 5.00                                                             | 0.90  | 26579                                   |
| HHC+CIP_24h | 61.63                                      | 0.36                                                               | 0.78  | 120                                     | 1.44                                                               | 0.77  | 40246                                   | 12.20                                                            | 0.76  | 28420                                   |
